# Supplementary material for: Association of Concomitant Bone Resorption Inhibitors With Overall Survival Among Patients With Metastatic Castration-Resistant Prostate Cancer and Bone Metastases Receiving Abiraterone Acetate With Prednisone as First-Line Therapy
Source: PubMed Central journal article supplement (PMC8299314; doi:10.1001/jamanetworkopen.2021.16536), 2021-07-22
Supplement: jamanetwopen-e2116536-s001.pdf [file jamanetwopen-e2116536-s001.pdf]

## Supplementary Online Content

Francini E, Montagnani F, Nuzzo PV, et al. Association of concomitant bone resorption inhibitors with overall survival among patients with metastatic castration-resistant prostate cancer and bone metastases receiving abiraterone acetate with prednisone as first-line therapy. *JAMA Netw Open*. 2021;4(7):e2116536. doi:10.1001/jamanetworkopen.2021.16536

**eTable 1.** Characteristics of Patients With Complete and Incomplete Data

**eTable 2.** Univariate and Multivariate Analyses of Overall Survival in Overall Population

**eTable 3.** Univariate and Multivariate Analyses of Time to First Skeletal-related Event in Overall Population

**eTable 4.** Overall Survival Analysis According to BRI Use Stratified by Covariates

**eTable 5.** Univariable and Multivariable Analyses of Overall Survival in Overall Population Stratified by Center

**eTable 6.** Patient Characteristics and Overall Survival According to BRI Use Stratified by Center

**eFigure.** Study Population Flowchart

This supplementary material has been provided by the authors to give readers additional information about their work.

**eTable 1.** Characteristics of Patients With Complete and Incomplete Data

| Variable                                 | Overall population<br>n=745 | Patients with available<br>data<br>n=678 | P value |
|------------------------------------------|-----------------------------|------------------------------------------|---------|
| Median age at baseline, yrs (IQR)        | 77.6 (68.1-83.6)            | 77.3 (67.8-83.1)                         | 0.96    |
| Race, No. (%)                            |                             |                                          | 0.99    |
| Caucasian                                | 699 (93.8)                  | 635 (93.6)                               |         |
| Other                                    | 19 (2.5)                    | 18 (2.7)                                 |         |
| Not available                            | 27 (3.7)                    | 25 (3.6)                                 |         |
| Gleason score, No. (%)                   |                             |                                          | 0.98    |
| ≤6                                       | 62 (8.3)                    | 57 (8.4)                                 |         |
| 7                                        | 218 (29.3)                  | 200 (29.5)                               |         |
| ≥8                                       | 337 (45.2)                  | 310 (45.7)                               |         |
| Not available                            | 128 (17.2)                  | 111 (16.4)                               |         |
| Prior local therapy, No. (%)             |                             |                                          | 0.93    |
| No                                       | 353 (47.4)                  | 328 (48.4)                               |         |
| Surgery                                  | 196 (26.3)                  | 177 (26.1)                               |         |
| Radiotherapy                             | 181 (24.3)                  | 173 (25.5)                               |         |
| Not available                            | 15 (2.0)                    | 0                                        |         |
| De novo, No. (%)                         |                             |                                          | 0.70    |
| No                                       | 483 (64.9)                  | 433 (63.9)                               |         |
| Yes                                      | 262 (35.1)                  | 245 (36.1)                               |         |
| Treatment for mHSPC, No. (%)             |                             |                                          | 0.82    |
| ADT                                      | 617 (82.8)                  | 602 (88.8)                               |         |
| ADT+D                                    | 81 (10.8)                   | 76 (11.2)                                |         |
| Not available                            | 47 (6.4)                    | 0                                        |         |
| Volume of disease at baseline, No. (%)   |                             |                                          | 0.99    |
| Low                                      | 276 (37.0)                  | 269 (39.7)                               |         |
| High                                     | 420 (56.4)                  | 409 (60.3)                               |         |
| Not available                            | 49 (6.6)                    | 0                                        |         |
| Visceral metastases at baseline, No. (%) |                             |                                          | 0.99    |
| No                                       | 680 (91.3)                  | 619 (91.3)                               |         |
| Yes                                      | 65 (8.7)                    | 59 (8.7)                                 |         |
| Liver metastases at baseline, No. (%)    |                             |                                          | 0.62    |
| No                                       | 709 (95.2)                  | 649 (95.7)                               |         |
| Yes                                      | 36 (4.8)                    | 29 (4.3)                                 |         |
| ECOG PS at baseline, No. (%)             |                             |                                          | 0.55    |
| 0                                        | 324 (43.5)                  | 316 (46.7)                               |         |
| ≥1                                       | 369 (49.5)                  | 362 (53.3)                               |         |
| Not available                            | 52 (7.0)                    | 0                                        |         |
| Pain intensity at baseline, No. (%)      |                             |                                          | 0.94    |
| VAS 0-3                                  | 514 (69.0)                  | 506 (74.6)                               |         |
| VAS 4-5                                  | 112 (15.0)                  | 107 (15.8)                               |         |
| VAS >5                                   | 70 (9.4)                    | 65 (9.6)                                 |         |
| Not available                            | 49 (6.6)                    | 0                                        |         |
| Use of opioids at baseline, No. (%)      |                             |                                          | 0.79    |
| No                                       | 598 (80.3)                  | 585 (86.3)                               |         |
| Yes                                      | 99 (13.3)                   | 93 (13.7)                                |         |
| Not available                            | 48 (6.4)                    | 0                                        |         |
| Median PSA at baseline, ng/mL (IQR)      | 32 (10.0-98.5)              | 32.3 (10.2 – 99.7)                       | 0.95    |
| Use of BRI, No. (%)                      |                             |                                          | 0.36    |
| No                                       | 529 (71)                    | 504 (74.3)                               |         |

|                                                                                                                                                                                                                                                                                                                                                                                                                                                                                                                                                                                                                                                  |                  |                    |      |
|--------------------------------------------------------------------------------------------------------------------------------------------------------------------------------------------------------------------------------------------------------------------------------------------------------------------------------------------------------------------------------------------------------------------------------------------------------------------------------------------------------------------------------------------------------------------------------------------------------------------------------------------------|------------------|--------------------|------|
| Zoledronic Acid                                                                                                                                                                                                                                                                                                                                                                                                                                                                                                                                                                                                                                  | 84 (11.3)        | 70 (11.3)          |      |
| Denosumab                                                                                                                                                                                                                                                                                                                                                                                                                                                                                                                                                                                                                                        | 132 (17.7)       | 104 (14.2)         |      |
| Median time from start of AA to start of BRI, days (IQR)                                                                                                                                                                                                                                                                                                                                                                                                                                                                                                                                                                                         | 15 (0-68)        | 15 (0-67)          | 0.99 |
| Median time of BRI administration, days (IQR)                                                                                                                                                                                                                                                                                                                                                                                                                                                                                                                                                                                                    | 741 (362-1182)   | 738 (357-1174)     | 0.94 |
| Median AA cycles, n (IQR)                                                                                                                                                                                                                                                                                                                                                                                                                                                                                                                                                                                                                        | 9 (4-20)         | 9 (4-20)           | 0.99 |
| Pain palliation, No. (%)                                                                                                                                                                                                                                                                                                                                                                                                                                                                                                                                                                                                                         |                  |                    | 0.87 |
| No                                                                                                                                                                                                                                                                                                                                                                                                                                                                                                                                                                                                                                               | 198 (26.6)       | 190 (28)           |      |
| Yes                                                                                                                                                                                                                                                                                                                                                                                                                                                                                                                                                                                                                                              | 497 (66.7)       | 486 (71.7)         |      |
| Not available                                                                                                                                                                                                                                                                                                                                                                                                                                                                                                                                                                                                                                    | 50 (6.7)         | 2 (0.3)            |      |
| Number of treatments received after AA, Median (IQR)                                                                                                                                                                                                                                                                                                                                                                                                                                                                                                                                                                                             | 1 (0-2)          | 1 (0-2)            | 0.99 |
| 0-1                                                                                                                                                                                                                                                                                                                                                                                                                                                                                                                                                                                                                                              | 511 (68.6)       | 488 (72)           |      |
| >1                                                                                                                                                                                                                                                                                                                                                                                                                                                                                                                                                                                                                                               | 225 (30.2)       | 190 (28)           | 0.29 |
| Not available                                                                                                                                                                                                                                                                                                                                                                                                                                                                                                                                                                                                                                    | 9 (1.2)          | 0                  |      |
| Median FU in overall population, months (CI)                                                                                                                                                                                                                                                                                                                                                                                                                                                                                                                                                                                                     | 23.5 (19.8-24.9) | 23.5 (19.7 – 24.8) | 0.94 |
| <p>Abbreviations: AA = abiraterone acetate plus prednisone; ADT = androgen deprivation therapy; BRI = bone resorption inhibitors; CI = confidence interval; D = docetaxel; ECOG PS = Eastern Cooperative Oncology Group performance status; FU = follow-up; IQR = interquartile range; mHSPC = metastatic hormone-sensitive prostate cancer; NA = not available; PSA = prostate-specific antigen; VAS = visual analogue scale; yrs = years.</p> <p>Note: High volume is defined as <math>\geq 4</math> bone metastases of which at least 1 out of the pelvis and axis and/or visceral metastases); low volume is defined as not high volume.</p> |                  |                    |      |

**eTable 2.** Univariate and Multivariate Analyses of Overall Survival in Overall Population

| Variable                                                    | Univariable Analysis                 |               | Multivariable Analysis               |              |
|-------------------------------------------------------------|--------------------------------------|---------------|--------------------------------------|--------------|
|                                                             | HR (95%CI)                           | P value       | HR (95%CI)                           | P value      |
| Gleason grade<br>(ref. ≤6)<br>7<br>≥8                       | 0.82 (0.58-1.16)<br>1.06 (0.76-1.49) | .26<br>.72    | NA                                   | NA           |
| Prior local therapy<br>(ref. no)<br>Surgery<br>Radiotherapy | 0.62 (0.50-0.78)<br>0.73 (0.59-0.91) | <.001<br>.005 | 0.51 (0.39-0.68)<br>0.71 (0.55-0.93) | <.001<br>.03 |
| De-novo<br>(ref. no)                                        | 1.34 (1.12-1.61)                     | .001          | NS                                   | NS           |
| Treatment for mHSPC<br>(ref. ADT alone)                     | 0.97 (0.74-1.29)                     | .87           | NA                                   | NA           |
| Volume of disease at baseline<br>(ref. high volume)         | 0.60 (0.50-0.72)                     | <.001         | 0.66 (0.54-0.80)                     | <.001        |
| Visceral metastases at baseline (ref. no)                   | 1.45 (1.08-1.95)                     | .01           | NS                                   | NS           |
| Liver metastases at baseline (ref. no)                      | 1.75 (1.20-2.54)                     | .004          | 2.04 (1.37-3.05)                     | .006         |
| ECOG PS at baseline<br>(ref. 0)                             | 1.78 (1.49-2.13)                     | <.001         | 1.46 (1.20-1.78)                     | .003         |
| Pain intensity at baseline<br>(ref. VAS 0-3)<br>4-5<br>>5   | 1.26 (1.00-1.59)<br>2.03 (1.54-2.66) | .057<br><.001 | 1.13 (0.87-1.45)<br>1.88 (1.39-2.54) | .35<br><.001 |
| Use of opioids at baseline<br>(ref. no)                     | 1.64 (1.30-2.08)                     | <.001         | NS                                   | NS           |
| Use of BRI<br>(ref. no)                                     | 0.65 (0.54-0.79)                     | <.001         | 0.64 (0.52-0.79)                     | <.001        |
| PSA at baseline<br>(as a continuous variable)               | 1.05 (1.03-1.06)                     | <.001         | 1.03 (1.01-1.05)                     | .006         |
| Type of BRI used<br>(ref. zoledronic acid)                  | 0.93 (0.66 – 1.30)                   | .79           | NA                                   | NA           |

Abbreviations: ADT = androgen deprivation therapy; BRI = bone resorption inhibitors; CI = confidence interval; ECOG PS = Eastern Cooperative Oncology Group performance status; mHSPC = metastatic hormone-sensitive prostate cancer; HR = hazard ratio; NA = not available; NS = not significant; PSA = prostate-specific antigen; ref. = reference; VAS = visual analogue scale

Note: the multivariable analysis included a subset of patients (n=678) with all available covariates data.

High volume is defined as ≥4 bone metastases of which at least 1 out of the pelvis and axis and/or visceral metastases); low volume is defined as not high volume.

**eTable 3.** Univariate and Multivariate Analyses of Time to First Skeletal-related Event in Overall Population

| Variable                                            | Univariable Analysis |         | Multivariable Analysis |         |
|-----------------------------------------------------|----------------------|---------|------------------------|---------|
|                                                     | HR (95%CI)           | P value | HR (95%CI)             | P value |
| Gleason grade<br>(ref. ≤6)                          |                      |         |                        |         |
| 7                                                   | 1.03 (0.65-1.63)     | .88     | NA                     | NA      |
| ≥8                                                  | 1.13 (0.72-1.75)     | .59     |                        |         |
| Prior local therapy<br>(ref. no)                    |                      |         |                        |         |
| Surgery                                             | 0.79 (0.60-1.03)     | .08     | NA                     | NA      |
| Radiotherapy                                        | 0.75 (0.56-1.01)     | .05     |                        |         |
| De-novo<br>(ref. no)                                | 1.43 (1.13-1.81)     | .002    | NA                     | NA      |
| Treatment for mHSPC<br>(ref. ADT alone)             | 1.02 (0.71-1.47)     | .90     | NA                     | NA      |
| Volume of disease at baseline<br>(ref. high volume) | 0.74 (0.58-0.95)     | .02     | 0.73 (0.57-0.93)       | .01     |
| Visceral metastases at baseline (ref. no)           | 0.99 (0.63-1.56)     | .96     | NA                     | NA      |
| Liver metastases at baseline (ref. no)              | 1.43 (0.83-2.44)     | .19     | NA                     | NA      |
| ECOG PS at baseline<br>(ref. 0)                     | 1.53 (1.21-1.94)     | .005    | NS                     | NS      |
| Pain intensity at baseline<br>(ref. VAS 0-3)        |                      |         |                        |         |
| 4-5                                                 | 1.51 (1.10-2.05)     | .009    | 1.50 (1.10-2.04)       | .001    |
| >5                                                  | 3.42 (2.43-4.82)     | <.001   | 3.52 (2.49-4.98)       | <.001   |
| Use of opioids at baseline<br>(ref. no)             | 2.42 (1.81-3.23)     | <.001   | NS                     | NS      |
| Use of BRI<br>(ref. no)                             | 1.27 (1.00-1.60)     | .04     | NS                     | NS      |
| PSA at baseline<br>(as a continuous variable)       | 1.02 (0.98-1.05)     | .08     | NA                     | NA      |

Abbreviations: ADT = androgen deprivation therapy; BRI = bone resorption inhibitors; CI = confidence interval; ECOG PS = Eastern Cooperative Oncology Group performance status; mHSPC = metastatic hormone-sensitive prostate cancer; HR = hazard ratio; NA = not available; NS = not significant; PSA = prostate-specific antigen; ref. = reference; VAS = visual analogue scale  
Note: the multivariable analysis included a subset of patients (n=685) with all available covariates data.  
High volume is defined as ≥4 bone metastases of which at least 1 out of the pelvis and axis and/or visceral metastases; low volume is defined as not high volume.

**eTable 4.** Overall Survival Analysis According to BRI Use Stratified by Covariates

| <b>Variables used for stratification</b>         | <b>HR (95% CI)</b> | <b>P value</b> |
|--------------------------------------------------|--------------------|----------------|
| Center                                           | 0.75 (0.61-0.93)   | .01            |
| Volume of disease at baseline (ref. high volume) | 0.67 (0.54-0.82)   | .002           |
| Prior local therapy (ref. no)                    | 0.68 (0.56-0.83)   | .001           |
| De-novo (ref. no)                                | 0.65 (0.54-0.78)   | <.001          |
| Liver metastases at baseline (ref. no)           | 0.65 (0.53-0.79)   | <.001          |
| Visceral metastases at baseline (ref. no)        | 0.66 (0.54-0.80)   | <.001          |
| ECOG PS at baseline (ref. 0)                     | 0.66 (0.54-0.82)   | .001           |
| Pain intensity at baseline (ref. VAS 0-3)        | 0.61 (0.49-0.75)   | <.001          |
| Use of opioid at baseline (ref. no)              | 0.59 (0.48-0.73)   | <.001          |
| PSA at baseline (> median value)                 | 0.66 (0.55-0.80)   | <.001          |

Abbreviations: BRI = bone resorption inhibitors; CI = confidence interval; ECOG PS = Eastern Cooperative Oncology Group performance status; HR = hazard ratio; PSA = prostate-specific antigen  
 Note: Median PSA = 32 ng/ml. High volume is defined as  $\geq 4$  bone metastases of which at least 1 out of the pelvis and axis and/or visceral metastases); low volume is defined as not high volume.

**eTable 5.** Univariable and Multivariable Analyses of Overall Survival in Overall Population Stratified by Center

| Variable                                                    | Univariable Analysis                 |               | Multivariable Analysis               |               |
|-------------------------------------------------------------|--------------------------------------|---------------|--------------------------------------|---------------|
|                                                             | HR (95%CI)                           | P value       | HR (95%CI)                           | P value       |
| Gleason grade<br>(ref. ≤6)<br>7<br>≥8                       | 0.82 (0.58-1.16)<br>1.06 (0.76-1.49) | 0.26<br>0.72  | NA                                   | NA            |
| Prior local therapy<br>(ref. no)<br>Surgery<br>Radiotherapy | 0.62 (0.50-0.78)<br>0.73 (0.59-0.91) | <.001<br>.005 | 0.58 (0.45-0.73)<br>0.79 (0.63-0.99) | <.001<br>.04  |
| De-novo<br>(ref. no)                                        | 1.34 (1.12-1.60)                     | .001          | NS                                   | NS            |
| Treatment for mHSPC<br>(ref. ADT alone)                     | 1.26 (0.93-1.71)                     | .14           | NA                                   | NA            |
| Volume of disease at baseline<br>(ref. high volume)         | 0.72 (0.58-0.88)                     | .001          | 0.68 (0.55-0.84)                     | .004          |
| Visceral metastases at baseline<br>(ref. no)                | 1.43 (1.06-1.94)                     | .02           | NS                                   | NS            |
| Liver metastases at baseline<br>(ref. no)                   | 1.96 (1.33-2.89)                     | .007          | 1.97 (1.29-3.01)                     | .002          |
| ECOG PS at baseline<br>(ref. 0)                             | 1.62 (1.33-1.97)                     | <.001         | 1.42 (1.16-1.75)                     | .008          |
| Pain intensity at baseline<br>(ref. VAS 0-3)<br>4-5<br>>5   | 1.43 (1.10-1.84)<br>1.96 (1.47-2.60) | .006<br><.001 | 1.14 (0.87-1.49)<br>1.86 (1.37-2.52) | 0.33<br><.001 |
| Use of opioids at baseline<br>(ref. no)                     | 1.80 (1.41-2.86)                     | <.001         | NS                                   | NS            |
| Use of BRI<br>(ref. no)                                     | 0.75 (0.61-0.93)                     | 0.01          | 0.67 (0.51-0.88)                     | .004          |
| PSA at baseline<br>(as a continuous variable)               | 1.06 (1.05-1.07)                     | <.001         | 1.03 (1.01-1.04)                     | .001          |
| Type of BRI used<br>(ref. zoledronic acid)                  | 0.97 (0.69-1.35)                     | .81           | NA                                   | NA            |

Abbreviations: ADT = androgen deprivation therapy; BRI = bone resorption inhibitors; CI = confidence interval; ECOG PS = Eastern Cooperative Oncology Group performance status; mHSPC = metastatic hormone-sensitive prostate cancer; HR = hazard ratio; NA = not available; NS = not significant; PSA = prostate-specific antigen; ref. = reference; VAS = visual analogue scale  
Note: the multivariable analysis included a subset of patients (n=678) with all available covariates data. High volume is defined as ≥4 bone metastases of which at least 1 out of the pelvis and axis and/or visceral metastases; low volume is defined as not high volume.

**eTable 6.** Patient Characteristics and Overall Survival According to BRI Use Stratified by Center

| Center | Number of Patients | Median OS, months (95% CI) | % BRI administration | Mean subsequent treatments | % ECOG PS >1 | % high volume | Median baseline PSA (IQR) |
|--------|--------------------|----------------------------|----------------------|----------------------------|--------------|---------------|---------------------------|
| 1      | 24                 | 26.8 (18.0-NR)             | 20.8                 | 0.6                        | 45.8         | 66.7          | 67 (11.7-116.3)           |
| 2      | 39                 | 29.3 (24.5-NR)             | 80.0                 | 1.2                        | 63.1         | 24.2          | 8.0 (3.5-36.0)            |
| 3      | 26                 | 37.4 (21.6-NR)             | 11.5                 | 0.8                        | 46.1         | 46.1          | 15.5 (4.25-51.5)          |
| 4      | 26                 | 24.4 (16.4-NR)             | 19.2                 | 0.8                        | 30.8         | 30.8          | 12.0 (4.0-39.3)           |
| 5      | 126                | 36.5 (33.4-50.1)           | 47.2                 | 2.3                        | 15.1         | 33.3          | 16.1 (3.4-45.2)           |
| 6      | 393                | 21 (18.7-23.5)             | 6.9                  | 0.6                        | 64.8         | 80.0          | 55.6 (21.2-155.2)         |
| 7      | 10                 | 34.8 (16.7-NR)             | 70.0                 | 1.2                        | 40.0         | 50.0          | 24.9 (15.3-65.1)          |
| 8      | 45                 | 33.1 (22.8-49.2)           | 73.0                 | 3.3                        | NA*          | NA*           | 15.4 (7.62-58.5)          |

Abbreviations: BRI = bone resorption inhibitors; CI = confidence interval; ECOG PS = Eastern Cooperative Oncology Group performance status; HR = hazard ratio; IQR = interquartile range; NA = not available; NR = not reached; PSA = prostate-specific antigen

Note: High volume is defined as  $\geq 4$  bone metastases of which at least 1 out of the pelvis and axis and/or visceral metastases); low volume is defined as not high volume.

\* data for ECOG-PS and volume were not available for this center.



## eFigure. Study Population Flowchart

eFigure 1. Study population flow.

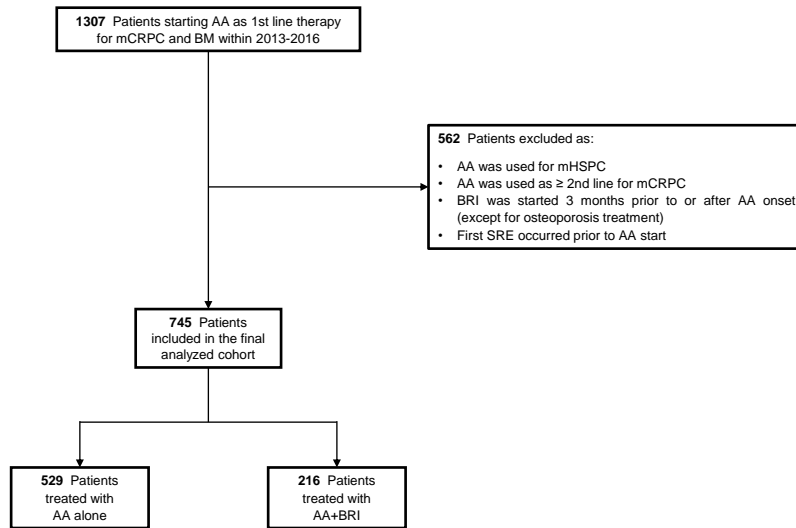

Legend: AA = abiraterone acetate plus prednisone; BM = bone metastases; BRI = bone-resorption inhibitors (zoledronic acid or denosumab); mCRPC = metastatic castration-resistant prostate cancer; mHSPC = metastatic hormone-sensitive prostate cancer; SRE = skeletal-related event (definition: palliative radiotherapy or surgery to bone, pathological fractures, or spinal cord compression)

Note: Number of deaths prior to data cut-off date (September 15, 2019) were 369 among those treated with AA and 147 among those treated with AA+BRI.
